# Supplementary material for: Design of efficient color-tunable long persistent luminescence phosphor BaGa2O4:Pr3+ and its performance enhancement via a trap-induced strategy
Source: Royal Society of Chemistry journal article supplement (doi:10.1039/d1tc04763a), 2021-12-22
Supplement: d1tc04763a1.pdf [file d1tc04763a1.pdf]

## Supporting Information

### **Design of efficient color-tunable long persistent luminescence phosphor BaGa<sub>2</sub>O<sub>4</sub>:Pr<sup>3+</sup> and its performance enhancement via trap-induced strategy**

*Xilin Ma<sup>a</sup>, Peng Feng<sup>a</sup>, Yajie Wang<sup>a</sup>, Songsong Ding<sup>a</sup>,*

*Songlu Tian<sup>a</sup>, Yuhua Wang<sup>a,\*</sup>*

<sup>a</sup> National and Local Joint Engineering Laboratory for Optical Conversion Materials and Technology of National Development and Reform Commission, Department of Materials Science,  
Cross-Strait Research and Technology Transfer Center for Optoelectronic Materials & Devices of Lanzhou University and Taiwan Kun Shan University,  
School of Materials and Energy, Lanzhou University, No. 222, South Tianshui Road, Lanzhou, Gansu, 730000, P. R. China.

\*Corresponding author' email: [wyh@lzu.edu.cn](mailto:wyh@lzu.edu.cn)

Table S1 Test conditions of PSL decay curves and thermoluminescence (TL) glow curves

| Conditions             | PSL decay curves                     | Thermoluminescence (TL) glow curves                           |
|------------------------|--------------------------------------|---------------------------------------------------------------|
| Pre-treatment          | Keep at 400°C for 3min in dark room. | Keep at 400°C for 3min in dark room.                          |
| Mass of samples        | Filling the sample tank(~2g)         | 0.005g                                                        |
| Testing temperature    | Room temperature (20°C)              | From room temperature to 400°C via programed heating (1°C/s). |
| Irradiation wavelength | 254nm                                | 254nm                                                         |
| Power of UV light      | 24W                                  | 24W                                                           |
| Irradiation distance   | 5cm above the samples.               | 5cm above the samples.                                        |
| Pre-irradiation times  | 180s                                 | 180s                                                          |
| Delay times            | 5s                                   | 5s                                                            |

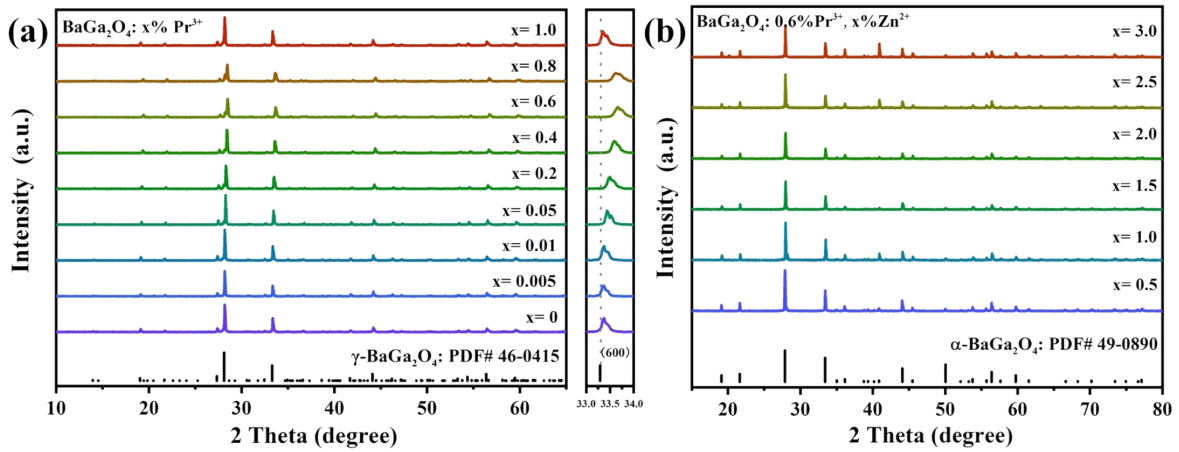

Fig. S1 (a) XRD patterns of BGO: x% Pr<sup>3+</sup>. Inset is the peak shifting between 33°-34° corresponding to (600) crystallography plane. (b) XRD patterns of BGO: 0.6% Pr<sup>3+</sup>, x% Zn<sup>2+</sup>.

Table S2 Cell parameters and refinement results of BGO: 0.6% Pr<sup>3+</sup> and BGO: 0.6% Pr<sup>3+</sup>, 2.0% Zn<sup>2+</sup>

| Formula                | BGO: 0.6% Pr <sup>3+</sup> | BGO: 0.6% Pr <sup>3+</sup> , 2.0% Zn <sup>2+</sup> |
|------------------------|----------------------------|----------------------------------------------------|
| Crystal system         | Hexagonal                  | Hexagonal                                          |
| Space group            | P6 <sub>3</sub>            | P6 <sub>3</sub> 22                                 |
| a= b (Å)               | 18.63(3)                   | 5.34(3)                                            |
| c (Å)                  | 8.66(3)                    | 8.81(3)                                            |
| $\alpha$ = $\beta$ (°) | 90                         | 90                                                 |
| $\gamma$ (°)           | 120                        | 120                                                |
| R <sub>wp</sub>        | 0.1144                     | 0.1333                                             |
| R <sub>p</sub>         | 0.0863                     | 0.1084                                             |
| $\chi^2$               | 1.805                      | 1.636                                              |

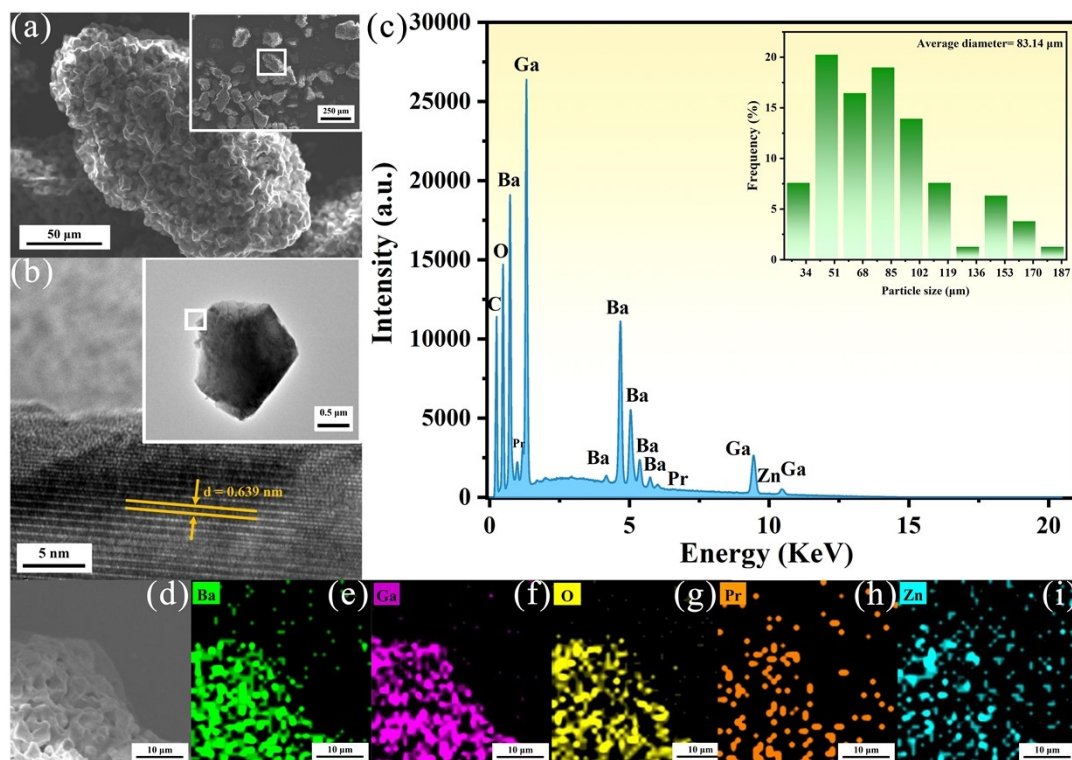

Fig. S2 (a) SEM images of BGO: 0.6% Pr<sup>3+</sup>. (b) HRTEM image of BGO: 0.6% Pr<sup>3+</sup>. Inset is the morphology under TEM mode. (c) EDX spectrum of BGO: 0.6% Pr<sup>3+</sup>, 2.0% Zn<sup>2+</sup>. Inset is the particle size distribution of BGO: 0.6% Pr<sup>3+</sup>, 2.0% Zn<sup>2+</sup>. (d)-(i) Mapping-scan of BGO: 0.6% Pr<sup>3+</sup>, 2.0% Zn<sup>2+</sup>.

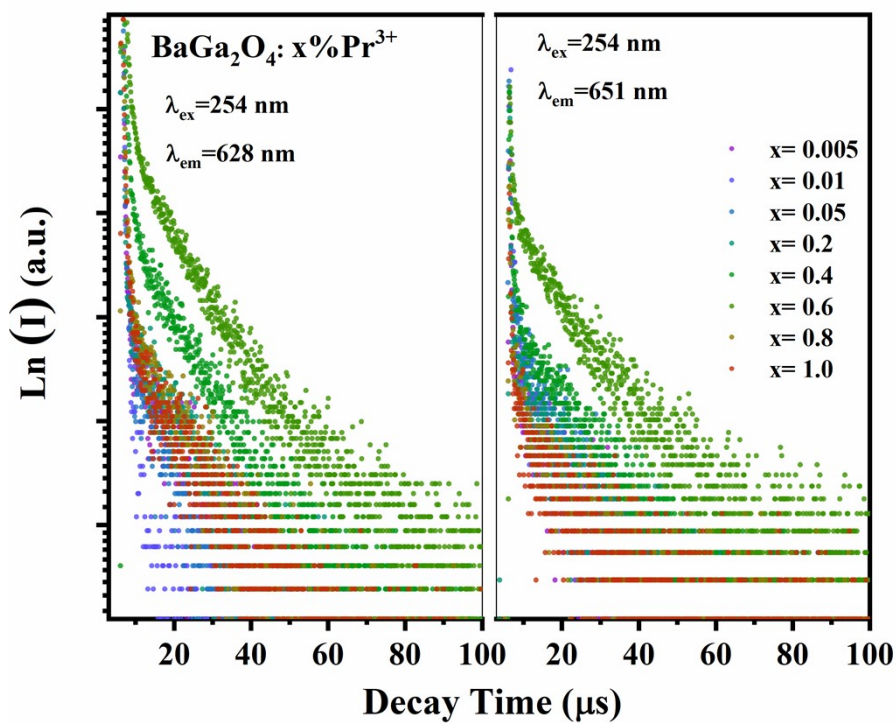

Fig. S3 The decay curves of BGO: x% Pr<sup>3+</sup> under 254nm excitation.

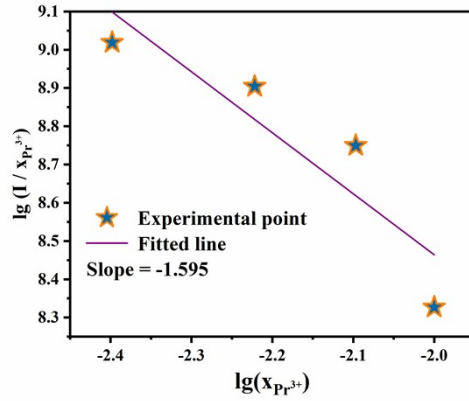

Fig. S4 Fitted line of  $\lg(I/x_{Pr^{3+}})$  VS.  $\lg(x_{Pr^{3+}})$  for  $BaGa_2O_4: x\%Pr^{3+}$  phosphors.

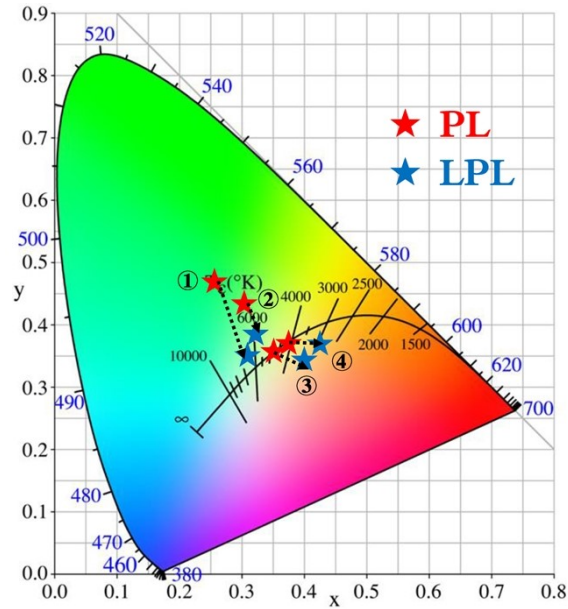

Fig. S5 CIE chromaticity coordination of  $BGO: x\% Pr^{3+}$  (①:  $x=0.005$ , ②:  $x=0.01$ , ③:  $x=0.2$ , ④:  $x=0.6$ )

Table S3 CIE chromaticity coordinate calculation of  $BGO: x\% Pr^{3+}$

| Samples      | PL     |        | LPL    |        |
|--------------|--------|--------|--------|--------|
|              | CIE x  | CIE y  | CIE x  | CIE y  |
| ①: $x=0.005$ | 0.259  | 0.4689 | 0.3099 | 0.354  |
| ②: $x=0.01$  | 0.3072 | 0.4304 | 0.323  | 0.3785 |
| ③: $x=0.2$   | 0.3547 | 0.3566 | 0.4003 | 0.3468 |
| ④: $x=0.6$   | 0.3738 | 0.3647 | 0.425  | 0.3662 |

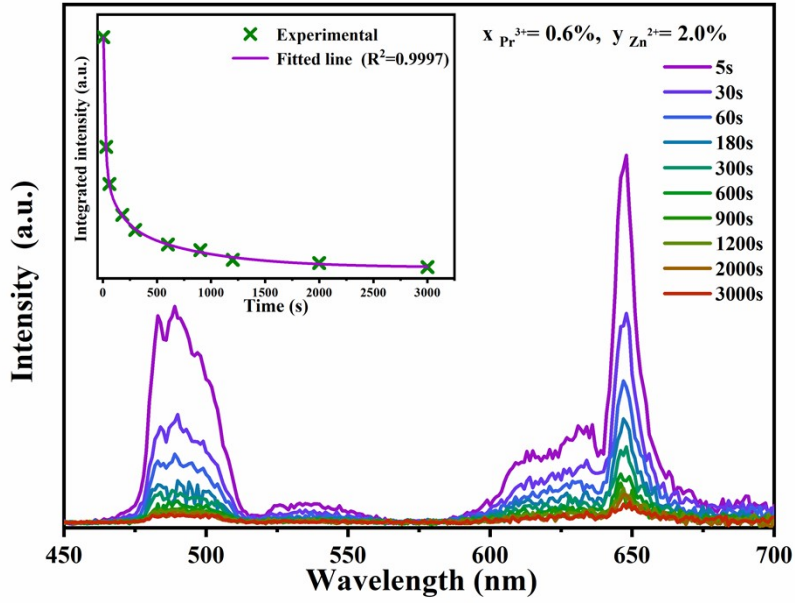

Fig. S6 LPL spectra of BGO: 0.6 % Pr<sup>3+</sup>, 2.0%Zn<sup>2+</sup>. Inset is the fitted duration curve.

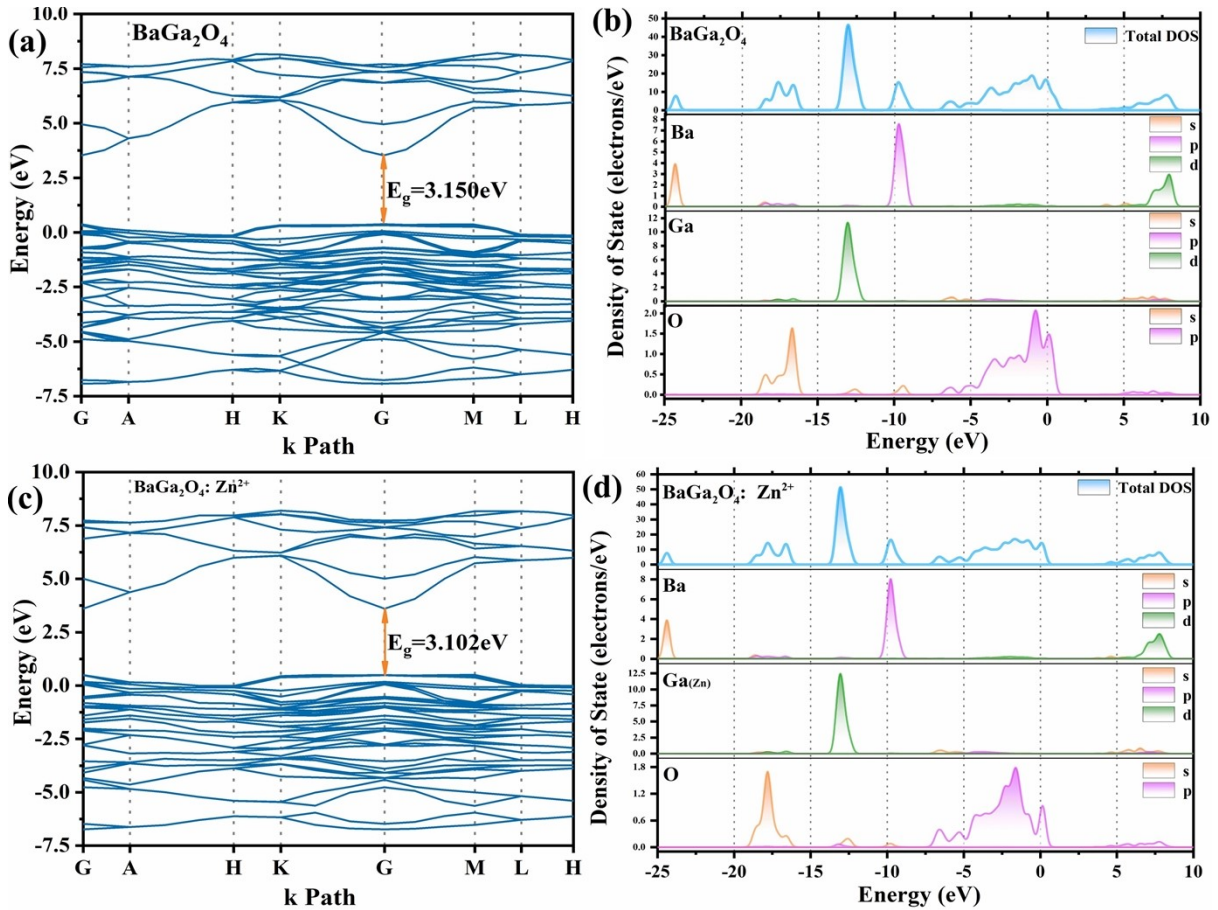

Fig. S7 Band structure: (a) BGO host, (c) Single Zn<sup>2+</sup> doped sample, and density of states: (b) BGO host, (d) Single Zn<sup>2+</sup> doped sample.

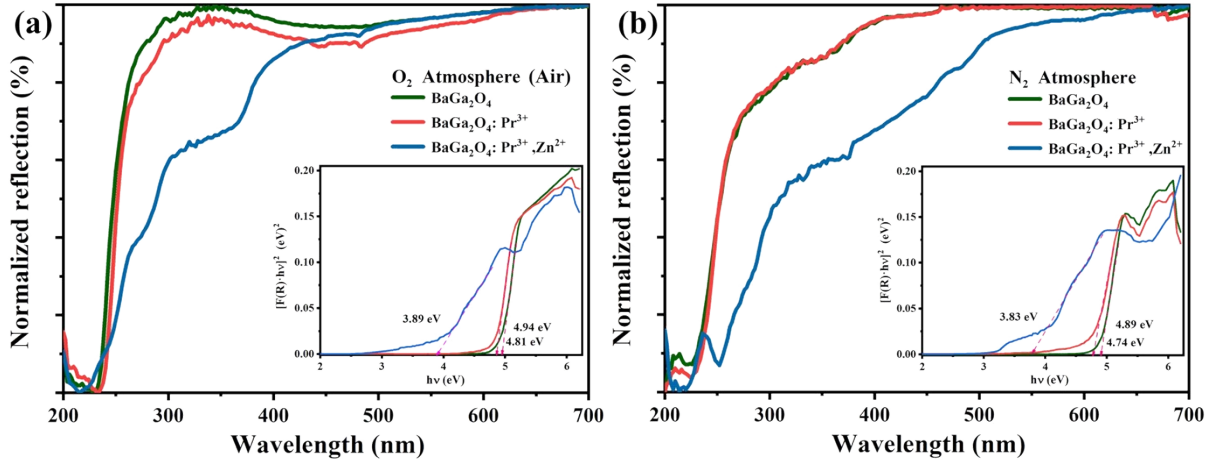

Fig. S8 The DRS spectra of BGO:  $x\%$   $\text{Pr}^{3+}$ ,  $y\%$   $\text{Zn}^{2+}$  sintered under different atmosphere: (a) Air sintered, (b)  $\text{N}_2$  sintered. The inset shows the Straight-line extrapolation under Kubelka-Munk formula of BGO.

Kubelka-Munk formula and Tauc equation are used to calculate the direct optical band gap of the materials based on the diffuse spectral experimental value <sup>1 2</sup>.

$$F_{(R)} = (1-R)^2/2R \quad (1)$$

$$[F_{(R)} \cdot hv]^n = \alpha (hv - E_g) \quad (2)$$

where,  $R$  is the relative reflectance of the thick sample determined by the white reference material ( $\text{BaSO}_4$ ),  $\alpha$  is the instrument parameter,  $n$  is the parameter to measure the band gap property of the material (direct band structure,  $n = 2$ ),  $E_g$  refers to the direct optical band gap of the materials,  $\nu$  is the frequency;  $h$  is the Planck constant ( $6.62618 \times 10^{-34} \text{Js}$ ), and  $c$  is the velocity of light ( $2.99792 \times 10^8 \text{ms}^{-1}$ ).

## Reference

1. H. Ji, L. Wang, M. S. Molokeev, N. Hirosaki, R. Xie, Z. Huang, Z. Xia, O. M. ten Kate, L. Liu and V. V. Atuchin, *Journal of Materials Chemistry C*, 2016, **4**, 6855-6863.
2. K. Li, M. Xu, J. Fan, M. Shang, H. Lian and J. Lin, *Journal of Materials Chemistry C*, 2015, **3**, 11618-11628.
